# Supplementary material
Source: PubMed Central journal article supplement (PMC8264757)
Supplement: jamasurg-e213012-s001.pdf [file jamasurg-e213012-s001.pdf]

## Supplemental Online Content

Elhage SA, Deerenberg EB, Ayuso SA, et al. Development and validation of image-based deep learning models to predict surgical complexity and complications in abdominal wall reconstruction. *JAMA Surg*. Published online July 7, 2021. doi:10.1001/jamasurg.2021.3012

### **eTable.** Baseline Patient Demographics

This supplemental material has been provided by the authors to give readers additional information about their work.

**eTable. Baseline Patient Demographics**

|                              | <b>PATIENTS<br/>N=369 (%)</b> |
|------------------------------|-------------------------------|
| <b>Age, years</b>            | 57.9±12.6                     |
| <b>Female</b>                | 232 (62.9)                    |
| <b>BMI, kg/m<sup>2</sup></b> | 34.0±7.7                      |
| <b>Race/ethnicity</b>        |                               |
| <b>White</b>                 | 323 (87.5)                    |
| <b>African American</b>      | 38 (10.4)                     |
| <b>Asian American</b>        | 3 (0.8)                       |
| <b>Native American</b>       | 3 (0.8)                       |
| <b>Latino</b>                | 2 (0.5)                       |
| <b>Defect Width, cm</b>      | 9.8±5.4                       |
| <b>Diabetes</b>              | 113 (30.6)                    |
| <b>Smokers</b>               | 56 (15.2)                     |
| <b>COPD</b>                  | 32 (8.7)                      |
| <b>Asthma</b>                | 65 (17.6)                     |
| <b>Prior Hernia Repair</b>   | 237 (64.2)                    |
| <b>CDC Wound Class</b>       |                               |
| <b>Clean</b>                 | 284 (77.0)                    |
| <b>Clean-Contaminated</b>    | 45 (12.2)                     |
| <b>Contaminated</b>          | 39 (10.6)                     |
| <b>Dirty</b>                 | 1 (0.0)                       |
| <b>Follow-Up (Months)</b>    | 32.3±32.4                     |

Patient and Hernia characteristics of patients surveyed. BMI = Body Mass Index. CDC = Centers for Disease Control and Prevention
